# Supplementary material for: Type 2 Diabetes-Related Variants Influence the Risk of Developing Prostate Cancer: A Population-Based Case-Control Study and Meta-Analysis
Source: MDPI journal article supplement (doi:10.3390/cancers14102376), 2022-05-12
Supplement: s1 [file s1]

**Supplementary Table S3.** Summary of functional and regulatory annotation of most significant SNPs.

| Gene          | dbSNP                   | Chr | Position (hg38) | Ref. allele | Risk allele | PHM <sup>a,b</sup>                                        | EHM <sup>a,b</sup>                                                                                                                                                                                                                                                                                                                                                                                                                                       | eQTL <sup>c</sup>                                                                                | Regulatory Motifs Changed <sup>d</sup>           | Proteins Bound <sup>d</sup> |
|---------------|-------------------------|-----|-----------------|-------------|-------------|-----------------------------------------------------------|----------------------------------------------------------------------------------------------------------------------------------------------------------------------------------------------------------------------------------------------------------------------------------------------------------------------------------------------------------------------------------------------------------------------------------------------------------|--------------------------------------------------------------------------------------------------|--------------------------------------------------|-----------------------------|
| <i>ADAM30</i> | <i>ADAM30</i> rs2641348 | 1   | 119895261       | A           | G           | ESC.H9<br>ESDR.H1.BMP4.TROP<br>LIV.ADLT<br>BLD.DND41.CNCR | ESC.I3<br>BLD.CD34.CC<br>BLD.CD15.PC<br>SKIN.PEN.FRSK.FIB.01<br>SKIN.PEN.FRSK.FIB.02<br>SKIN.PEN.FRSK.KER.03<br>BRN.GRM.MTRX<br>OVRY<br>PLCNT.FET<br>LIV.ADLT<br>PANC<br>BLD.DND41.CNCR<br>LIV.HEPG2.CNCR<br>BRST.HMEC<br>SKIN.NHEK                                                                                                                                                                                                                      | 9.75•10 <sup>-06</sup><br>RP5-<br>104218.7<br>1.38•10 <sup>-08</sup><br>NOTCH2<br>0.0026<br>REG4 | Cphx<br>Hoxb6<br>Nkx2_10<br>Nkx2_8               |                             |
| <i>FTO</i>    | <i>FTO</i> rs9939609    | 16  | 53786615        | T           | A           | ESC.WA7<br>BLD.CD8.NPC<br>FAT.MSC.DR.ADIP                 | ESDR.H1.MSC<br>BLD.CD4.CD25M.CD45RA.NPC<br>BLD.CD4.CD25M.IL17M.PL.TPC<br>BLD.CD8.NPC<br>STRM.MRW.MSC<br>SKIN.PEN.FRSK.KER.03<br>BRST.MYO<br>BRN.HIPP.MID<br>BRN.ANT.CAUD<br>BRN.CING.GYR<br>BRN.DL.PRFRTL.CRTX<br>FAT.ADIP.NUC<br>MUS.SKLT.F<br>HRT.ATR.R<br>HRT.VENT.L<br>HRT.VNT.R<br>VAS.AOR<br>GI.CLN.SM.MUS<br>GI.STMC.FET<br>GI.S.INT<br>GI.ESO<br>GI.STMC.GAST<br>LNG.FET<br>OVRY<br>PANC.ISLT<br>LNG.A549.ETOH002.CNCR<br>BRST.HMEC<br>SKIN.NHEK |                                                                                                  | Nanog_disc4<br>Pou5f1_disc1<br>Pou5f1_know<br>n1 |                             |
| <i>HNF1B</i>  | <i>HNF1B</i> rs7501939  | 17  | 37741165        | T           | C           | ESC.HUES6                                                 | ESC.HUES48                                                                                                                                                                                                                                                                                                                                                                                                                                               | 9.2•10 <sup>-04</sup>                                                                            | CEBPB_know                                       |                             |

|       |                            |    |          |   |   |                                                                                                                                                                                                                                                                                                                                                                                                                                                                       |                                                                                                                                                                                                                                                                                                                                                                                                                                                                                                                                                             |                  |                                    |       |
|-------|----------------------------|----|----------|---|---|-----------------------------------------------------------------------------------------------------------------------------------------------------------------------------------------------------------------------------------------------------------------------------------------------------------------------------------------------------------------------------------------------------------------------------------------------------------------------|-------------------------------------------------------------------------------------------------------------------------------------------------------------------------------------------------------------------------------------------------------------------------------------------------------------------------------------------------------------------------------------------------------------------------------------------------------------------------------------------------------------------------------------------------------------|------------------|------------------------------------|-------|
|       |                            |    |          |   |   | ESC.HUES64<br>ESC.4STAR<br>IPSC.20B<br>IPSC.15b<br>ESDR.CD184.ENDO<br>ESDR.H1.MSC<br>BLD.CD4.CD25M.CD45RA.NPC<br>BLD.CD4.CD25M.IL17M.PL.TPC<br>BLD.CD4.CD25M.CD45RO.MPC<br>BLD.CD4.MPC<br>FAT.ADIP.DR.MSC<br>BRN.CING.GYR<br>FAT.ADIP.NUC<br>GI.CLN.SM.MUS<br>GI.RECT.SM.MUS<br>GI.L.INT.FET<br>GI.CLN.MUC<br>GI.RECT.MUC.29<br>GI.RECT.MUC.31<br>GI.STMC.MUC<br>GI.DUO.MUC<br>KID.FET<br>LNG.FET<br>PANC.ISLT<br>LIV.ADLT<br>LNG.A549.ETOH002.CNCR<br>LIV.HEPG2.CNCR | ESC.4STAR<br>IPSC.20B<br>IPSC.18<br>ESDR.CD184.ENDO<br>ESDR.H1.MSC<br>BLD.CD4.CD25M.CD127M.TREGPC<br>BLD.CD4.CD25M.TPC<br>BLD.CD4.CD25M.CD45RA.NPC<br>BLD.CD4.CD25M.IL17M.PL.TPC<br>BLD.CD4.CD25M.IL17P.PL.TPC<br>BLD.CD4.CD25M.CD45RO.MPC<br>BLD.CD4.MPC<br>BLD.CD8.MPC<br>BLD.CD8.NPC<br>BRN.HIPP.MID<br>BRN.SUB.NIG<br>BRN.CING.GYR<br>GI.DUO.SM.MUS<br>GI.CLN.SM.MUS<br>GI.S.INT.FET<br>GI.L.INT.FET<br>GI.CLN.MUC<br>GI.RECT.MUC.29<br>GI.RECT.MUC.31<br>GI.STMC.MUC<br>GI.DUO.MUC<br>PANC.ISLT<br>LIV.ADLT<br>LNG.A549.ETOH002.CNCR<br>LIV.HEPG2.CNCR | HNF1B            | n3<br>DMRT5<br>DMRT7<br>p300_disc2 |       |
| HNF1B | HNF1B <sub>rs757210</sub>  | 17 | 37736525 | T | C | ESDR.H1.NEUR.PROG<br>LIV.ADLT                                                                                                                                                                                                                                                                                                                                                                                                                                         | ESC.4STAR<br>IPSC.DF.19.11<br>ESDR.CD184.ENDO<br>ESDR.H1.MSC<br>BRST.HMEC.35<br>GI.CLN.MUC<br>PLCNT.AMN<br>PANC<br>LNG.A549.ETOH002.CNCR                                                                                                                                                                                                                                                                                                                                                                                                                    | 0.00177<br>HNF1B | HES1                               |       |
| HNF1B | HNF1B <sub>rs4430796</sub> | 17 | 37738049 | G | A | IPSC.15b<br>KID.FET<br>LIV.ADLT<br>LNG.A549.ETOH002.CNCR                                                                                                                                                                                                                                                                                                                                                                                                              | LNG.IMR90<br>ESC.WA7<br>ESC.I3<br>ESC.HUES48<br>ESDR.CD56.MESO<br>ESDR.CD184.ENDO<br>ESDR.H1.BMP4.MESO<br>ESDR.H1.MSC<br>STRM.MRW.MSC<br>STRM.CHON.MRW.DR.MSC<br>FAT.ADIP.DR.MSC                                                                                                                                                                                                                                                                                                                                                                            | 0.0024<br>HNF1B  | Maf_disc2                          | STAT3 |

|       |                             |   |          |   |   |                                          |                                                                                                                                                                                                                                                                                                                                                                                                                                                                                                                                                                                         |                        |                                                                    |      |
|-------|-----------------------------|---|----------|---|---|------------------------------------------|-----------------------------------------------------------------------------------------------------------------------------------------------------------------------------------------------------------------------------------------------------------------------------------------------------------------------------------------------------------------------------------------------------------------------------------------------------------------------------------------------------------------------------------------------------------------------------------------|------------------------|--------------------------------------------------------------------|------|
|       |                             |   |          |   |   |                                          | FAT.MSC.DR.ADIP<br>SKIN.PEN.FRSK.KER.03<br>BRST.HMEC.35<br>GI.S.INT.FET<br>GI.L.INT.FET<br>GI.CLN.MUC<br>GI.STMC.MUC<br>GI.STMC.GAST<br>PLCNT.AMN<br>PLCNT.FET<br>LIV.ADLT<br>LNG.A549.ETOH002.CNCR<br>MUS.HSMMT<br>BRN.NHA<br>BONE.OSTEO                                                                                                                                                                                                                                                                                                                                               |                        |                                                                    |      |
| JAZF1 | JAZF1 <sub>rs10486567</sub> | 7 | 27936944 | G | A | LNG.A549.ETOH002.CNCR<br>FAT.ADIP.DR.MSC | LNG.IMR90<br>ESDR.CD184.ENDO<br>STRM.MRW.MSC<br>STRM.CHON.MRW.DR.MSC<br>FAT.ADIP.DR.MSC<br>FAT.MSC.DR.ADIP<br>SKIN.PEN.FRSK.FIB.01<br>SKIN.PEN.FRSK.FIB.02<br>SKIN.PEN.FRSK.MEL.01<br>SKIN.PEN.FRSK.MEL.03<br>BRN.HIPP.MID<br>BRN.SUB.NIG<br>BRN.CING.GYR<br>BRN.INF.TMP<br>BRN.DL.PRFRTL.CRTX<br>FAT.ADIP.NUC<br>MUS.PSOAS<br>MUS.SKLT.F<br>MUS.SKLT.M<br>MUS.TRNK.FET<br>MUS.LEG.FET<br>HRT.FET<br>HRT.ATR.R<br>GI.CLN.SM.MUS<br>GI.RECT.SM.MUS<br>GI.CLN.SIG<br>GI.RECT.MUC.29<br>KID.FET<br>LNG.FET<br>PANC.ISLT<br>LNG.A549.ETOH002.CNCR<br>MUS.HSMMT<br>SKIN.NHDFAD<br>BONE.OSTEO |                        | Ik-2_2<br>Lhx3_2<br>Mef2_known1<br>Mef2_known4<br>Nkx3_2<br>Zfp410 | p300 |
| LTA   | LTA <sub>rs1041981</sub>    | 6 | 31573007 | C | A | ESDR.H1.MSC                              | IPSC.DF.19.11                                                                                                                                                                                                                                                                                                                                                                                                                                                                                                                                                                           | 2.05•10 <sup>-09</sup> | LBP-1_3                                                            |      |

|      |                           |    |          |   |   |                                                                                                                                                                                                                                                                                                                                                                                                                                                                                                                                                                                                                                                                                                                                                   |                                                                                                                                                                                                                                                                                                                                                                                                                                                                                                                                                                                                                                                                  |                                                                                                                                                                                                                                                                                                                                                                                 |                                                                                                             |  |
|------|---------------------------|----|----------|---|---|---------------------------------------------------------------------------------------------------------------------------------------------------------------------------------------------------------------------------------------------------------------------------------------------------------------------------------------------------------------------------------------------------------------------------------------------------------------------------------------------------------------------------------------------------------------------------------------------------------------------------------------------------------------------------------------------------------------------------------------------------|------------------------------------------------------------------------------------------------------------------------------------------------------------------------------------------------------------------------------------------------------------------------------------------------------------------------------------------------------------------------------------------------------------------------------------------------------------------------------------------------------------------------------------------------------------------------------------------------------------------------------------------------------------------|---------------------------------------------------------------------------------------------------------------------------------------------------------------------------------------------------------------------------------------------------------------------------------------------------------------------------------------------------------------------------------|-------------------------------------------------------------------------------------------------------------|--|
|      |                           |    |          |   |   | BLD.PER.MONUC.PC<br>BLD.CD3.PPC<br>BLD.CD4.CD25I.CD127.TMEMPC<br>BLD.CD3.CPC<br>BLD.CD4.CD25.CD127M.TREGP<br>C<br>BLD.CD4.CD25M.TPC<br>BLD.CD4.CD25M.CD45RA.NPC<br>BLD.CD4.CD25M.IL17M.PL.TPC<br>BLD.CD4.CD25M.IL17P.PL.TPC<br>BLD.CD4.CD25M.CD45RO.MPC<br>BLD.CD4.MPC<br>BLD.CD8.MPC<br>BLD.CD4.NPC<br>BLD.CD8.NPC<br>BLD.CD19.CPC<br>BLD.CD19.PPC<br>BLD.CD56.PC<br>SKIN.PEN.FRISK.FIB.01<br>SKIN.PEN.FRISK.FIB.02<br>SKIN.PEN.FRISK.FIB.02<br>BRST.MYO<br>THYM<br>THYM.FET<br>BRN.INF.TMP<br>BRN.FET.M<br>MUS.SKLT.F<br>HRT.FET<br>GI.RECT.SM.MUS<br>GI.STMC.MUS<br>GI.S.INT<br>GI.CLN.MUC<br>GI.RECT.MUC.29<br>GI.STMC.MUC<br>GI.DUO.MUC<br>GI.ESO<br>PLCNT.AMN<br>LIV.ADLT<br>BLD.GM12878<br>CRVX.HELAS3.CNCR<br>LIV.HEPG2.CNCR<br>MUS.HSMMT | ESDR.CD56.MESO<br>ESDR.H1.BMP4.TROP<br>ESDR.H1.MSC<br>BLD.PER.MONUC.PC<br>BLD.CD3.PPC<br>BLD.CD4.CD25I.CD127.TMEMPC<br>BLD.CD3.CPC<br>BLD.CD4.CD25.CD127M.TREGPC<br>BLD.CD4.CD25M.TPC<br>BLD.CD4.MPC<br>BLD.CD8.MPC<br>BLD.CD4.NPC<br>BLD.CD8.NPC<br>BLD.CD14.PC<br>BLD.CD19.CPC<br>BLD.CD34.PC<br>BLD.MOB.CD34.PC.M<br>BLD.MOB.CD34.PC.F<br>BLD.CD34.CC<br>BLD.CD19.PPC<br>BLD.CD56.PC<br>SKIN.PEN.FRISK.FIB.01<br>SKIN.PEN.FRISK.FIB.02<br>THYM<br>THYM.FET<br>MUS.SKLT.M<br>HRT.VNT.R<br>GI.STMC.MUS<br>GI.S.INT<br>GI.CLN.MUC<br>GI.RECT.MUC.29<br>GI.DUO.MUC<br>GI.ESO<br>PLCNT.AMN<br>LIV.ADLT<br>LNG<br>SPLN<br>BLD.GM12878<br>MUS.HSMMT<br>BLD.CD14.MONO | PSMB9<br>$3.09 \cdot 10^{-09}$<br>YIF1B<br>$8.57 \cdot 10^{-07}$<br>HLA-DRB5<br>$3.44 \cdot 10^{-06}$<br>CYP21A1P<br>$3.47 \cdot 10^{-06}$<br>LY6G6C<br>$1.78 \cdot 10^{-07}$<br>HCG22<br>0.0017<br>AIF1<br>$2.636 \cdot 10^{-16}$<br>BAT1<br>$1.73 \cdot 10^{-04}$<br>CSNK2B<br>$3.53 \cdot 10^{-04}$<br>HCP5<br>$5.15 \cdot 10^{-05}$<br>LST1<br>$7.50 \cdot 10^{-12}$<br>TNF | RFX5_disc1<br>Sin3Ak-<br>20_disc6<br>Znf143_disc3                                                           |  |
| MADD | MADD <sub>rs7944584</sub> | 11 | 47314769 | A | T | ESC.WA7<br>BLD.CD4.NPC<br>FAT.ADIP.DR.MSC<br>SKIN.PEN.FRISK.FIB.01<br>SKIN.NHDFAD                                                                                                                                                                                                                                                                                                                                                                                                                                                                                                                                                                                                                                                                 | LNG.IMR90<br>BLD.MOB.CD34.PC.F<br>FAT.ADIP.DR.MSC<br>SKIN.PEN.FRISK.FIB.01<br>FAT.ADIP.NUC<br>HRT.ATR.R<br>MUS.HSMMT<br>SKIN.NHDFAD                                                                                                                                                                                                                                                                                                                                                                                                                                                                                                                              | $5.12 \cdot 10^{-06}$<br>NUP160<br>$2.42 \cdot 10^{-06}$<br>SPI1<br>$9.36 \cdot 10^{-06}$<br>ACP2<br>0.0022<br>CUGBP1                                                                                                                                                                                                                                                           | AP-1_known1<br>AP-1_known2<br>AP-1_known3<br>AP-1_known4<br>AP-4_1<br>BATF_disc1<br>Irf_disc2<br>KAP1_disc1 |  |

|       |                             |   |           |   |   |                                                                                               |                                                                                                                                                                                                                                                                                                                                                                                                                                                                                                                                                                                                                                                                                                                    |                                                                              |                  |  |
|-------|-----------------------------|---|-----------|---|---|-----------------------------------------------------------------------------------------------|--------------------------------------------------------------------------------------------------------------------------------------------------------------------------------------------------------------------------------------------------------------------------------------------------------------------------------------------------------------------------------------------------------------------------------------------------------------------------------------------------------------------------------------------------------------------------------------------------------------------------------------------------------------------------------------------------------------------|------------------------------------------------------------------------------|------------------|--|
|       |                             |   |           |   |   |                                                                                               | LNG.NHLF<br>BONE.OSTEO                                                                                                                                                                                                                                                                                                                                                                                                                                                                                                                                                                                                                                                                                             | 1.29•10 <sup>-07</sup><br>MADD<br>1.954•10 <sup>-14</sup><br>MYBPC3 M<br>ADD | NF-<br>E2_known1 |  |
| NOTCH | NOTCH <sub>rs10923931</sub> | 1 | 119975336 | G | T | ESC.WA7<br>ESDR.CD184.ENDO<br>BLD.CD15.PC<br>FAT.MSC.DR.ADIP<br>FAT.ADIP.NUC<br>BLD.CD14.MONO | BLD.CD14.PC<br>BLD.MOB.CD34.PC.M<br>BLD.MOB.CD34.PC.F<br>BLD.CD34.CC<br>BLD.CD15.PC<br>STRM.CHON.MRW.DR.MSC<br>FAT.ADIP.DR.MSC<br>FAT.MSC.DR.ADIP<br>MUS.SAT<br>SKIN.PEN.FRSK.FIB.01<br>SKIN.PEN.FRSK.FIB.02<br>SKIN.PEN.FRSK.MEL.03<br>SKIN.PEN.FRSK.KER.02<br>SKIN.PEN.FRSK.KER.03<br>BRST.HMEC.35<br>BRST.MYO<br>BRN.CRTX.DR.NRSPHR<br>THYM<br>BRN.HIPP.MID<br>BRN.SUB.NIG<br>BRN.ANT.CAUD<br>BRN.ANG.GYR<br>BRN.DL.PRFRTL.CRTX<br>FAT.ADIP.NUC<br>MUS.PSOAS<br>MUS.SKLT.F<br>HRT.ATR.R<br>VAS.AOR<br>GI.CLN.SM.MUS<br>GI.RECT.SM.MUS<br>BLD.CD14.MONO<br>GI.CLN.SIG<br>GI.RECT.MUC.29<br>GI.ESO<br>GI.STMC.GAST<br>LIV.ADLT<br>LNG<br>SPLN<br>BRST.HMEC<br>MUS.HSMMT<br>SKIN.NHDFAD<br>SKIN.NHEK<br>BONE.OSTEO | 2.7•10 <sup>-03</sup><br>REG4<br>7.3•10 <sup>-06</sup><br>NOTCH              |                  |  |
| RBMS1 | RBMS1 <sub>rs7593730</sub>  | 2 | 160314943 | T | C | STRM.CHON.MRW.DR.MSC                                                                          | LNG.IMR90                                                                                                                                                                                                                                                                                                                                                                                                                                                                                                                                                                                                                                                                                                          | 3.31•10 <sup>-07</sup>                                                       |                  |  |

|  |  |  |  |  |  |                                                                                                                                                           |                                                                                                                                                                                                                                                                                                                                                                                                                                                                                                                                                                                                                                                                                                                                                                                                                                                                                                          |                                          |  |  |
|--|--|--|--|--|--|-----------------------------------------------------------------------------------------------------------------------------------------------------------|----------------------------------------------------------------------------------------------------------------------------------------------------------------------------------------------------------------------------------------------------------------------------------------------------------------------------------------------------------------------------------------------------------------------------------------------------------------------------------------------------------------------------------------------------------------------------------------------------------------------------------------------------------------------------------------------------------------------------------------------------------------------------------------------------------------------------------------------------------------------------------------------------------|------------------------------------------|--|--|
|  |  |  |  |  |  | FAT.ADIP.DR.MSC<br>FAT.MSC.DR.ADIP<br>FAT.ADIP.NUC<br>MUS.SKLT.F<br>MUS.SKLT.M<br>GI.CLN.SM.MUS<br>GI.RECT.MUC.29<br>MUS.HSMM<br>MUS.HSMMT<br>SKIN.NHDFAD | ESC.WA7<br>ESC.H9<br>LNG.IMR90<br>ESC.WA7<br>ESC.H9<br>ESC.I3<br>ESC.HUES64<br>ESC.4STAR<br>IPSC.20B<br>ESDR.H9.NEUR.PROG<br>ESDR.H9.NEUR<br>ESDR.CD56.MESO<br>ESDR.H1.BMP4.TROP<br>BLD.CD4.CD25I.CD127.TMEMPC<br>BLD.CD4.CD25M.TPC<br>BLD.CD4.CD25M.CD45RA.NPC<br>BLD.CD4.CD25M.IL17M.PL.TPC<br>BLD.CD4.CD25M.IL17P.PL.TPC<br>BLD.CD4.CD25M.CD45RO.MPC<br>BLD.CD4.MPC<br>BLD.CD8.MPC<br>BLD.CD4.NPC<br>BLD.CD8.NPC<br>STRM.MRW.MSC<br>STRM.CHON.MRW.DR.MSC<br>FAT.ADIP.DR.MSC<br>FAT.MSC.DR.ADIP<br>MUS.SAT<br>SKIN.PEN.FRSK.FIB.01<br>SKIN.PEN.FRSK.FIB.02<br>SKIN.PEN.FRSK.MEL.01<br>SKIN.PEN.FRSK.MEL.03<br>SKIN.PEN.FRSK.KER.03<br>BRST.MYO<br>BRN.HIPP.MID<br>BRN.ANT.CAUD<br>BRN.DL.PRFRNTL.CRTX<br>FAT.ADIP.NUC<br>MUS.PSOAS<br>MUS.SKLT.F<br>MUS.SKLT.M<br>MUS.TRNK.FET<br>HRT.FET<br>HRT.VENT.L<br>HRT.VNT.R<br>GI.DUO.SM.MUS<br>GI.CLN.SM.MUS<br>GI.RECT.SM.MUS<br>GI.S.INT<br>GI.RECT.MUC.31 | RBMS1<br>1.47•10 <sup>-05</sup><br>ITGB6 |  |  |
|--|--|--|--|--|--|-----------------------------------------------------------------------------------------------------------------------------------------------------------|----------------------------------------------------------------------------------------------------------------------------------------------------------------------------------------------------------------------------------------------------------------------------------------------------------------------------------------------------------------------------------------------------------------------------------------------------------------------------------------------------------------------------------------------------------------------------------------------------------------------------------------------------------------------------------------------------------------------------------------------------------------------------------------------------------------------------------------------------------------------------------------------------------|------------------------------------------|--|--|

|        |                              |   |           |   |   |                                                                                                                                                                                         |                                                                                                                                                                                                                                                                                                                                                                                                                                                                                                                                                                                                                                                              |         |  |
|--------|------------------------------|---|-----------|---|---|-----------------------------------------------------------------------------------------------------------------------------------------------------------------------------------------|--------------------------------------------------------------------------------------------------------------------------------------------------------------------------------------------------------------------------------------------------------------------------------------------------------------------------------------------------------------------------------------------------------------------------------------------------------------------------------------------------------------------------------------------------------------------------------------------------------------------------------------------------------------|---------|--|
|        |                              |   |           |   |   | GI.STMC.GAST<br>LNG.FET<br>OVRY<br>LIV.ADLT<br>SPLN<br>LNG.A549.ETOH002.CNCR<br>MUS.HSMM<br>MUS.HSMMT<br>VAS.HUVEC<br>BLD.CD14.MONO<br>BRN.NHA<br>SKIN.NHDFAD<br>LNG.NHLF<br>BONE.OSTEO |                                                                                                                                                                                                                                                                                                                                                                                                                                                                                                                                                                                                                                                              |         |  |
| SLC2A2 | SLC2A2 <sub>rs11920090</sub> | 3 | 170999732 | T | A | ESC.H9<br>ESDR.CD184.ENDO<br>FAT.ADIP.DR.MSC<br>BRN.ANT.CAUD<br>GI.CLN.SM.MUS<br>GI.DUO.MUC<br>LIV.ADLT<br>LNG.A549.ETOH002.CNCR<br>LIV.HEPG2.CNCR<br>VAS.HUVEC<br>BRN.NHA<br>SKIN.NHEK | LNG.IMR90<br>ESC.HUES48<br>ESC.HUES64<br>ESDR.H9.NEUR.PROG<br>ESDR.H9.NEUR<br>ESDR.CD56.MESO<br>ESDR.CD184.ENDO<br>ESDR.H1.BMP4.MESO<br>ESDR.H1.MSC<br>ESDR.H1.BMP4.MESO<br>ESDR.H1.MSC<br>BLD.CD34.PC<br>BLD.MOB.CD34.PC.M<br>BLD.MOB.CD34.PC.F<br>BLD.CD34.CC<br>STRM.MRW.MSC<br>STRM.CHON.MRW.DR.MSC<br>FAT.ADIP.DR.MSC<br>FAT.MSC.DR.ADIP<br>MUS.SAT<br>SKIN.PEN.FRSK.FIB.01<br>SKIN.PEN.FRSK.FIB.02<br>SKIN.PEN.FRSK.MEL.03<br>SKIN.PEN.FRSK.KER.02<br>SKIN.PEN.FRSK.KER.03<br>BRST.HMEC.35<br>BRST.MYO<br>BRN.CRTX.DR.NRSPHR<br>BRN.HIPP.MID<br>BRN.SUB.NIG<br>BRN.ANT.CAUD<br>BRN.CING.GYR<br>BRN.ANG.GYR<br>FAT.ADIP.NUC<br>VAS.AOR<br>GI.DUO.SM.MUS | Prrx2_1 |  |

|       |                            |   |          |   |   |                                                                                                                                                                                                                                                                                                                                                                                                                                                       |                                                                                                                                                |  |  |
|-------|----------------------------|---|----------|---|---|-------------------------------------------------------------------------------------------------------------------------------------------------------------------------------------------------------------------------------------------------------------------------------------------------------------------------------------------------------------------------------------------------------------------------------------------------------|------------------------------------------------------------------------------------------------------------------------------------------------|--|--|
|       |                            |   |          |   |   | GI.CLN.SM.MUS<br>GI.RECT.SM.MUS<br>GI.STMC.MUS<br>GI.S.INT.FET<br>GI.L.INT.FET<br>GI.S.INT<br>GI.CLN.SIG<br>GI.RECT.MUC.29<br>GI.RECT.MUC.31<br>GI.STMC.MUC<br>GI.DUO.MUC<br>PLCNT.AMN<br>KID.FET<br>LNG.FET<br>PANC.ISLT<br>ADRL.GLND.FET<br>LIV.ADLT<br>PANC<br>LNG.A549.ETOH002.CNCR<br>CRVX.HELAS3.CNCR<br>LIV.HEPG2.CNCR<br>BRST.HMEC<br>MUS.HSMM<br>VAS.HUVEC<br>BLD.K562.CNCR<br>BRN.NHA<br>SKIN.NHDFAD<br>SKIN.NHEK<br>LNG.NHLF<br>BONE.OSTEO |                                                                                                                                                |  |  |
| THADA | THADA <sub>rs7578597</sub> | 2 | 43505684 | T | C | IPSC.18<br>BRN.DL.PRFRNTL.CRTX<br>OVRY<br>ESC.HUES6<br>ESC.HUES48<br>ESC.HUES64<br>IPSC.18<br>IPSC.15b<br>ESDR.CD56.ECTO<br>ESDR.CD184.ENDO<br>SKIN.PEN.FRSK.FIB.02<br>SKIN.PEN.FRSK.KER.03<br>BRN.GANGEM.DR.NRSPHR<br>BRN.SUB.NIG<br>LNG.FET<br>BLD.CD14.MONO                                                                                                                                                                                        | Foxo_3<br>Mef2_disc1<br>Pou5f1_disc1<br>Sox_10<br>Sox_13<br>Sox_15<br>Sox_16<br>Sox_18<br>Sox_19<br>Sox_2<br>Sox_4<br>Sox_5<br>Sox_9<br>Zfp105 |  |  |

Abbreviations: PHM, protomer histone marks; EHM, enhancer histone marks; Ref, reference.

<sup>a</sup> HaploReg v4 based epigenomic changes

<sup>b</sup> CHc15sm, ChromHMM (core 15-state model); CHc25sm, ChromHMM (core 25-state model using 12 imputed marks); H3K4me1/H3K4me3, H3K4me1 and H3K4me3 peaks; H3K27ac/H3K9ac, H3K27ac and H3K9ac peaks



<sup>c</sup> eQTL data from Haploreg v4 (Whole blood).

<sup>d</sup> Functional annotation from the ENCODE based tool HaploReg v4 (website [http://www.broadinstitute.org/mammals/haploreg/haploreg\\_v4.php](http://www.broadinstitute.org/mammals/haploreg/haploreg_v4.php))
